# Supplementary material for: Increased Plasma Levels of Gut-Derived Phenolics Linked to Walking and Running Following 2-Weeks Flavonoid Supplementation
Source: Preprints.org preprint supplement (doi:10.20944/preprints201810.0287.v1), 2018-10-15
Supplement: Supplementary file 1 [file supplementary]

## Table S1: Metabolites and Reference Standards

### Acute Exercise and Fitness Status Linked to Increased Plasma Concentrations of Gut-Derived Phenolics

David C. Nieman<sup>1\*</sup>, Colin D. Kay,<sup>2</sup> Atul S. Rathore<sup>2</sup>, Mary H. Grace<sup>2</sup>, Renee C. Strauch<sup>2</sup>, Ella H. Stephan<sup>1</sup>, Camila Sakaguchi<sup>1</sup>, Mary Ann Lila<sup>2</sup>.

<sup>1</sup> Human Performance Laboratory, Appalachian State University, North Carolina Research Campus, Kannapolis, North Carolina, USA; [niemandc@appstate.edu](mailto:niemandc@appstate.edu) (D.C.N.); [estephan@email.unc.edu](mailto:estephan@email.unc.edu) (E.H.S.); [camila.sakaguchi@hotmail.com](mailto:camila.sakaguchi@hotmail.com) (C.S.).

<sup>2</sup> Food Bioprocessing and Nutrition Sciences, Plants for Human Health Institute, North Carolina State University, North Carolina Research Campus, Kannapolis, North Carolina, USA; [cdkay@ncsu.edu](mailto:cdkay@ncsu.edu) (C.D.K.); [mhgrace@ncsu.edu](mailto:mhgrace@ncsu.edu) (M.H.G.); [rcstrauc@ncsu.edu](mailto:rcstrauc@ncsu.edu) (R.C.S.); [mlila@ncsu.edu](mailto:mlila@ncsu.edu) (M.A.L.).

\* Correspondence: [niemandc@appstate.edu](mailto:niemandc@appstate.edu); Tel.: +1-828-773-0056

Received: date; Accepted: date; Published: date

| Metabolite                                                  | CAS        | Reference Standard | Relative Quantifier                            | # Transitions |
|-------------------------------------------------------------|------------|--------------------|------------------------------------------------|---------------|
| theanine                                                    | 3081-61-6  | ✓                  | reference standard                             | 5             |
| 3-hydroxybenzoic acid-4-sulfate                             | synthetic  | ✓                  | reference standard                             | 1             |
| 3-hydroxybenzoic acid-4-O-glucuronide                       | synthetic  | ✓                  | reference standard                             | 3             |
| hydroxybenzoic acid-diglucuronide                           | x          | x                  | 3-hydroxybenzoic acid-4-O-glucuronide          | 4             |
| 3,4-dihydroxybenzoic acid                                   | 99-50-3    | ✓                  | reference standard                             | 3             |
| 4-hydroxybenzoic acid                                       | 99-96-7    | ✓                  | reference standard                             | 3             |
| 4-hydroxybenzoic acid-3-O-glucuronide                       | synthetic  | ✓                  | reference standard                             | 4             |
| -(-)gallocatechin                                           | 3371-27-5  | ✓                  | reference standard                             | 5             |
| hippuric acid                                               | 495-69-2   | ✓                  | reference standard                             | 3             |
| 5-hydroxyphenylpropanoic acid-3-sulfate                     | synthetic  | ✓                  | reference standard                             | 1             |
| 3-methoxy-benzoic acid-4-O-glucuronide                      | synthetic  | ✓                  | reference standard                             | 3             |
| 4-methoxybenzoic acid-3-sulfate                             | synthetic  | ✓                  | reference standard                             | 3             |
| 2-hydroxyphenylacetic acid                                  | 614-75-5   | ✓                  | reference standard                             | 3             |
| hydroxybenzaldehyde-glucuronide                             | x          | x                  | 3-hydroxybenzoic acid-4-O-glucuronide          | 5             |
| 4-hydroxybenzaldehyde                                       | 123-08-0   | ✓                  | reference standard                             | 3             |
| hydroxyphenylacetic acid-glucuronide                        | x          | x                  | 4-hydroxyphenylproprionic acid-3-O-glucuronide | 4             |
| 5-O-caffeoylquinic acid                                     | x          | x                  | 4-O Caffeoylquinic acid                        | 4             |
| 3-methoxybenzoic acid-sulfoglucuronide                      | x          | x                  | 3-methoxy-benzoic acid-4-O-glucuronide         | 4             |
| 3-methoxy-benzoic acid-4-sulfate                            | synthetic  | ✓                  | reference standard                             | 3             |
| 4-methoxy-cinnamic acid-3-sulfate                           | synthetic  | ✓                  | reference standard                             | 1             |
| (+)-catechin-O-glucuronide                                  | x          | x                  | quercetin-3-O-glucuronide                      | 5             |
| (+)-catechin                                                | 7295-85-4  | ✓                  | reference standard                             | 4             |
| (4R)-5-(3',4'-Dihydroxyphenyl)-γ-valerolactone-4'-O-sulfate | x          | ✓                  | reference standard                             | 4             |
| 3-O-caffeoylquinic acid                                     | x          | x                  | 4-O-caffeoylquinic acid                        | 4             |
| 3-(4-hydroxy-3-methoxyphenyl)propanoic acid-4-O-glucuronide | 86321-28-0 | ✓                  | reference standard                             | 1             |
| 4-methoxycinnamic acid-3-sulfoglucuronide                   | x          | x                  | 3-(3-hydroxy-4-methoxyphenyl)propionic acid    | 5             |
| 4-O-caffeoylquinic acid                                     | 905-99-7   | ✓                  | reference standard                             | 1             |

|                                                           |              |   |                                        |   |
|-----------------------------------------------------------|--------------|---|----------------------------------------|---|
| phenyl-valerolactone-sulfoglucuronide                     | synthetic    | x | 3-hydroxybenzoic acid-4-O-glucuronide  | 5 |
| 3-hydroxy-4-methoxybenzaldehyde                           | 621-59-0     | ✓ | reference standard                     | 3 |
| 4-hydroxy-3-methoxybenzoic acid                           | 121-34-6     | ✓ | reference standard                     | 7 |
| 3-hydroxy-4-methoxy-cinnamic acid-3-O-glucuronide         | 1065272-10-7 | ✓ | reference standard                     | 5 |
| 3-(3-hydroxyphenyl)propionic acid                         | 621-54-5     | ✓ | reference standard                     | 3 |
| phenyl-valerolactone-sulfate                              | synthetic    | x | 3,4-dihydroxybenzoic acid              | 3 |
| 3,4-dihydroxybenzoic acid methyl ester                    | 2150-43-8    | ✓ | reference standard                     | 4 |
| 5-(3'-hydroxyphenyl)-gamma-valerolactone-4'-O-glucuronide | synthetic    | x | 3-hydroxybenzoic acid-4-O-glucuronide  | 6 |
| 3-hydroxy-4-methoxybenzaldehyde                           | 645-08-9     | ✓ | reference standard                     | 3 |
| 3-(4-hydroxyphenyl)propionic acid                         | 501-97-3     | ✓ | reference standard                     | 3 |
| -(-)epicatechin                                           | 490-46-0     | ✓ | reference standard                     | 5 |
| 4-hydroxycinnamic acid                                    | 7400-08-0    | ✓ | reference standard                     | 3 |
| 3-O-caffeoylquinic acid-O-glucuronide                     | x            | x | 3-hydroxycinnamic acid-4-O-glucuronide | 6 |
| -(-)epicatechin-O-glucuronide                             | x            | x | quercetin-3-O-glucuronide              | 6 |
| 2-hydroxybenzoic acid                                     | 69-72-7      | ✓ | reference standard                     | 3 |
| -(-)epigallocatechin                                      | 970-74-1     | ✓ | reference standard                     | 5 |
| -(-)gallocatechin-O-glucuronide                           | x            | x | quercetin-3-O-glucuronide              | 6 |
| 3-(3-hydroxy-4-methoxyphenyl)propionic acid               | 1135-15-5    | ✓ | reference standard                     | 3 |
| 4-hydroxybenzoic acid methyl ester                        | 99-76-3      | ✓ | reference standard                     | 3 |
| myricetin 3-O-galactoside                                 | 15648-86-9   | ✓ | reference standard                     | 1 |
| quercetin 3-glucoside                                     | 482-35-9     | ✓ | reference standard                     | 1 |
| resveratrol                                               | 501-36-0     | ✓ | reference standard                     | 5 |
| myricetin                                                 | 529-44-2     | ✓ | reference standard                     | 5 |
| 3-O-feruloylquinic acid                                   | x            | x | 4-O-caffeoylquinic acid                | 3 |
| 4-O-feruloylquinic acid                                   | x            | x | 4-O-caffeoylquinic acid                | 3 |
| 5-O-feruloylquinic acid                                   | x            | x | 4-O-caffeoylquinic acid                | 3 |
| myricetin-O-glucuronide                                   | x            | x | myricetin 3-O-galactoside              | 6 |
| 4-methoxy-cinnamic acid-3-O-glucuronide                   | 1065272-10-7 | ✓ | reference standard                     | 4 |
| 3-methylquercetin                                         | 480-19-3     | ✓ | reference standard                     | 4 |
| valerolactone-disulfate                                   | x            | x | 3-hydroxybenzoic acid-4-O-glucuronide  | 5 |

|                                                             |              |   |                                                             |   |
|-------------------------------------------------------------|--------------|---|-------------------------------------------------------------|---|
| -(-)epigallocatechin gallate                                | 989-51-5     | ✓ | reference standard                                          | 4 |
| -(-)epigallocatechin gallate-O-glucuronide                  | x            | x | quercetin-3-O-glucuronide                                   | 5 |
| hydroxy-methoxyphenylacetic acid-O-glucuronide              | x            | x | 3-(4-hydroxy-3-methoxyphenyl)propanoic acid-4-O-glucuronide | 5 |
| phenylpropanoic acid-O-glucuronide                          | x            | x | 4-hydroxyphenylproprionic acid-3-O-glucuronide              | 5 |
| dihydroxybenzaldehyde-sulfate                               | x            | x | 3,4-dihydroxybenzoic acid                                   | 4 |
| trihydroxybenzaldehyde-sulfate                              | x            | x | 3,4-dihydroxybenzoic acid                                   | 4 |
| hippuric acid-sulfate                                       | x            | x | 3,4-dihydroxybenzoic acid                                   | 4 |
| dihydroxybenzoic acid-sulfate                               | x            | x | 3,4-dihydroxybenzoic acid                                   | 4 |
| 2,4-dihydroxy benzaldehyde                                  | 95-01-2      | ✓ | reference standard                                          | 5 |
| Kaempferol-7-O-neohesperidoside                             | 17353-03-6   | ✓ | reference standard                                          | 1 |
| 4'-O-methylquercetin                                        | synthetic    | ✓ | reference standard                                          | 6 |
| quercetin-3-O-glucuronide                                   | synthetic    | ✓ | reference standard                                          | 1 |
| quercetin-3-sulfate                                         | synthetic    | ✓ | reference standard                                          | 7 |
| (-)-5-(3',4'-dihydroxyphenyl)-γ-valerolactone               | 191666-22-5  | ✓ | reference standard                                          | 7 |
| (4R)-5-(3',4'-Dihydroxyphenyl)-γ-valerolactone-4'-O-sulfate | x            | x | 4-hydroxybenzoic acid-3-sulfate                             | 5 |
| kaempferol                                                  | 520-18-3     | ✓ | reference standard                                          | 7 |
| 4-methoxybenzoic acid-3-O-glucuronide                       | synthetic    | ✓ | reference standard                                          | 3 |
| 4-methoxybenzoic acid-3-sulfate                             | synthetic    | ✓ | reference standard                                          | 1 |
| benzoic acid-4-O-glucuronide                                | synthetic    | ✓ | reference standard                                          | 2 |
| 3-methoxybenzoic acid-4-O-glucuronide                       | synthetic    | ✓ | reference standard                                          | 3 |
| 3-hydroxyhippuric acid                                      | 1637-75-8    | ✓ | reference standard                                          | 6 |
| 4-hydroxybenzoic acid 3-sulfate                             | x            | x | 3-hydroxybenzoic acid-4-Sulfate                             | 3 |
| 3-hydroxycinnamic acid-4-O-glucuronide                      | 1093679-71-0 | ✓ | reference standard                                          | 1 |
| benzoic acid-3-O-glucuronide                                | x            | x | benzoic acid-4-O-glucuronide                                | 4 |
| 4-hydroxyphenylproprionic acid-3-O-glucuronide              | synthetic    | ✓ | reference standard                                          | 1 |
| 3-methoxyphenylacetic acid-4-sulfate                        | 38339-06-9   | ✓ | reference standard                                          | 5 |
| 3-(4-hydroxyphenyl)propanoic acid-3-sulfate                 | 1187945-70-5 | ✓ | reference standard                                          | 5 |
| 3,5-dihydroxyphenylpropanoic acid 3-O-glucuronide           | synthetic    | ✓ | reference standard                                          | 5 |
| methoxycinnamic acid-O-glucuronide                          | x            | x | 4-methoxycinnamic acid                                      | 6 |

|                                                   |              |   |                                             |   |
|---------------------------------------------------|--------------|---|---------------------------------------------|---|
| 4-methoxycinnamic acid                            | 830-09-1     | ✓ | reference standard                          | 3 |
| 3-methoxycinnamic acid                            | 6099-04-3    | ✓ | reference standard                          | 5 |
| delphinidin glucoside                             | 6906-38-3    | ✓ | reference standard                          | 1 |
| cyanidin-3-galactoside                            | 27661-36-5   | ✓ | reference standard                          | 1 |
| petunidin glucoside                               | 6988-81-4    | ✓ | reference standard                          | 1 |
| peonidin-3-O-galactoside                          | 28148-89-2   | ✓ | reference standard                          | 1 |
| peonidin-3-O-glucoside                            | 6906-39-4    | ✓ | reference standard                          | 1 |
| peonidin-O-diGlucuronide                          | x            | x | peonidin-3-O-glucoside                      | 6 |
| Malvidin-3-galactoside                            | 30113-37-2   | ✓ | reference standard                          | 1 |
| Kaempferol-3-O-rutinoside                         | 17650-84-9   | ✓ | reference standard                          | 5 |
| 3-(4-methoxyphenyl)propanoic acid-3-O-glucuronide | 1187945-72-7 | x | 3-(4-methoxyphenyl)propionic acid           | 4 |
| 3-(4-methoxyphenyl)propionic acid                 | 1929-29-9    | ✓ | reference standard                          | 3 |
| Kaempferol -7-O-glucopyranoside                   | 16290-07-6   | ✓ | reference standard                          | 5 |
| methoxyphenylacetic acid-O-glucuronide            | x            | x | 4-methoxyphenylacetic acid                  | 3 |
| 2-hydroxy-4-methoxybenzaldehyde                   | 673-22-3     | ✓ | reference standard                          | 3 |
| hydroxy-methoxybenzyldehyde-O-glucuronide         | x            | x | 3-hydroxy-4-methoxybenzaldehyde             | 4 |
| 4-methoxyphenylacetic acid                        | 104-01-8     | ✓ | reference standard                          | 3 |
| 4-hydroxyphenylacetic acid                        | 156-38-7     | ✓ | reference standard                          | 3 |
| 1,3,5-trihydroxybenzene                           | 108-73-6     | ✓ | reference standard                          | 3 |
| 3-hydroxy-4-methoxyphenylacetic acid              | 1131-94-8    | ✓ | reference standard                          | 5 |
| ascorbic acid-sulfate                             | x            | x | 3,4-dihydroxybenzoic acid                   | 6 |
| hydroxy-methoxycinnamic acid-sulfate              | x            | x | 3-(3-hydroxy-4-methoxyphenyl)propionic acid | 4 |
| hydroxy-methoxycinnamic acid-sulfate              | x            | x | 3-(3-hydroxy-4-methoxyphenyl)propionic acid | 6 |
| pyridoxic acid-sulfate                            | x            | x | 3-(3-hydroxyphenyl)propionic acid           | 5 |
| dihydroxy-methoxycinnamic acid-sulfate            | x            | x | 4-hydroxycinnamic acid                      | 6 |
| hippuric acid-sulfate methyl ester                | x            | x | 3,4-dihydroxybenzoic acid                   | 6 |
| hydroxy-dimethoxyphenylacetic acid-sulfate        | x            | x | 3,4-dihydroxybenzoic acid                   | 6 |
| methoxybenzoic acid-sulfate                       | x            | x | 4-hydroxy-3-methoxybenzoic acid             | 5 |
| methoxyphenylpropanoic acid-sulfate               | x            | x | 3,4-dihydroxybenzoic acid                   | 4 |
| Dimethoxybenzaldehyde-sulfate                     | x            | x | 4-hydroxy-3-methoxybenzoic acid             | 4 |

|                                            |   |   |                                 |   |
|--------------------------------------------|---|---|---------------------------------|---|
| hydroxy-dimethoxyphenylacetic acid-sulfate | x | x | 3,4-dihydroxybenzoic acid       | 4 |
| hydroxy-methoxybenzaldehyde-sulfate        | x | x | 4-hydroxy-3-methoxybenzoic acid | 4 |
| valeric acid-sulfate                       | x | x | 3,4-dihydroxybenzoic acid       | 5 |
| 2-(hydroxyphenyl)acetic acid-4-sulfate     | x | x | 3,4-dihydroxybenzoic acid       | 4 |
| 2-(hydroxyphenyl)acetic acid-4-sulfate     | x | x | 3,4-dihydroxybenzoic acid       | 4 |
