# Supplementary material for: Increased Plasma Levels of Gut-Derived Phenolics Linked to Walking and Running Following 2-Weeks Flavonoid Supplementation
Source: Preprints.org preprint supplement (doi:10.20944/preprints201810.0287.v1), 2018-10-15
Supplement: Supplementary file 1 [file supplementary]

## Sheet: Table of Contents
	Table S2: Gut-Derived Phenolic Metabolites

## Sheet: Gut-Derived Phenolic Data
1=placebo sit
2=placebo walk		Pre-Supplementation
3=flavonoid sit
4=flavonoid walk
5=flavonoid run
GROUP	IDNM	Thea127Q	3OHBA4OGA	BAdiOGA	34diOHBA	4OHBA	HA	3OCHBA4OGA	2OHPAA	OHBGA	4OHB	OHPAAGA	5CQA	3OCHBA4SGA	CatGA	Cat245Q	3OHPHVal4S	3OCHPPA4OGA	4CQA	PHValSGA	3OH4OCHB	4OH3OCHBA	3OHPPA	PHValS	34diOHBAM	3OHPHVal4OGA	3OH4OCHBA	4OHPPA	Ecat245Q	4OHCIA	CLGAGA	EcatGA	2OHBA	EGCat	GcatGA	3OH4OCHPPA	M4OHBA	MyrOgal	Que3OG	Res185Q	Myr151Q	5FQA	MyrGA	EGCatGGA	OHOCHPAAGA	PPAGA	diOHBAS	triOHBS	HAS
1	3	0.0001	0.00464055	0.00462231	0.0248688	0.132865	1.08107	0.00698134	0.0517729	0.0375497	0.0718396	1.75229	0.0532729	0.0019424	0.0713191	0.0199245	0.0111767	0.0118721	0.054747	0.00468546	0.374558	0.0731126	0.125681	0.0111523	0.0393274	0.00486743	0.0246386	0.123251	0.0478447	0.0729637	0.00633578	0.0711796	6.78086	0.00898461	0.0709252	0.0633152	0.0594478	0.0146572	0.0488693	0.0217992	0.184413	0.0715175	0.0185643	0.0765686	2.26757	0.0660105	0.0115704	0.0118381	0.0227726
1	7	0.0001	0.00461769	0.00467101	0.025677	0.182628	1.86643	0.00785942	0.0723362	0.0318009	0.0698483	2.37887	0.0534515	0.0001	0.071387	0.0212486	0.0112054	0.00951715	0.0537342	0.0001	0.452529	0.0726447	0.252768	0.0111088	0.0393099	0.00468001	0.0243232	0.238324	0.0476309	0.0741868	0.00640918	0.0712301	2.24372	0.00913171	0.0709132	0.0742717	0.0556395	0.0146551	0.0487983	0.0001	0.165527	0.0764114	0.0218163	0.0762169	1.22103	0.19772	0.0115439	0.0120107	0.0129178
1	16	0.0001	0.00462795	0.00466371	0.0239362	0.116314	3.26755	0.00631846	0.0840799	0.131254	0.0393922	2.03431	0.053519	0.0001	0.0717997	0.0222693	0.0112553	0.0075911	0.0548311	0.00480251	0.198881	0.0825653	0.307398	0.0112144	0.0393476	0.00482754	0.0247804	0.26221	0.0495544	0.0732408	0.0120036	0.0721444	1.54518	0.00853584	0.071003	0.0633308	0.0643235	0.0146886	0.0488084	0.0001	0.165661	0.0779226	0.0248313	0.116365	1.20711	0.233061	0.0001	0.0124185	0.0152839
1	18	0.0001	0.00484263	0.00457233	0.039281	0.053599	1.56919	0.00733559	0.0492684	0.0569253	0.033855	1.96091	0.0534919	0.0001	0.0717032	0.0214305	0.011587	0.00692507	0.0001	0.00482273	0.271905	0.0975149	0.349246	0.0112258	0.0393868	0.0001	0.0246623	0.346097	0.0474566	0.0725937	0.00594656	0.0714816	1.17141	0.0084727	0.0709994	0.0703424	0.0682615	0.0146485	0.0488051	0.0001	0.166672	0.0679701	0.0306049	0.0978396	0.774403	0.0895366	0.0119252	0.0124143	0.0131906
1	23	0.0001	0.00459948	0.00478359	0.0393338	0.115412	2.61466	0.00644886	0.0523986	0.073235	0.0647323	1.5239	0.0531618	0.00156954	0.0715592	0.020781	0.01127	0.00934537	0.0540794	0.0001	0.53082	0.0701084	0.54509	0.0112783	0.0392652	0.00477425	0.0242803	0.537296	0.0477358	0.0733572	0.00538744	0.0713897	6.08014	0.00883387	0.0001	0.0697678	0.0560047	0.0146578	0.0488014	0.0001	0.167868	0.0533261	0.0219043	0.0881867	0.613673	0.0808553	0.0118706	0.011432	0.0173196
1	34	0.0001	0.0057271	0.00580883	0.0001	0.00584997	0.632951	0.00281601	0.0436681	0.0281881	0.0001	1.21924	0.020989	0.0001	0.046242	0.0227066	0.0001	0.00863416	0.0218841	0.00577825	0.0001	0.0329742	0.0134776	0.0001	0.0170407	0.00580946	0.0223689	0.0228802	0.0424542	0.0660368	0.00137336	0.0460004	0.0249051	0.00551913	0.0457818	0.047111	0.0500821	0.0120963	0.0328736	0.0958999	0.173276	0.0244207	0.0180384	0.0562074	0.291315	0.0398201	0.0001	0.0001	0.0001
1	35	0.0001	0.00575036	0.00575068	0.00424276	0.0106887	0.387916	0.00308563	0.0368439	0.0320324	0.0001	0.823774	0.0212893	0.00227313	0.0462106	0.0224224	0.0001	0.00868291	0.0214329	0.00582453	0.0001	0.0319913	0.0228394	0.0001	0.0170723	0.00579613	0.0223796	0.0396331	0.0429654	0.0659533	0.00240154	0.0458828	0.0377282	0.00561507	0.0458225	0.0443441	0.0499546	0.0121068	0.032846	0.0965318	0.174313	0.0247375	0.0207734	0.0624029	0.189983	0.0638588	0.0001	0.0001	0.0001
1	36	0.0001	0.00575462	0.00575985	0.0001	0.00358945	1.07326	0.0029325	0.042061	0.0258317	0.0001	1.15551	0.0209954	0.0001	0.0460076	0.0225855	0.0001	0.00963772	0.0210922	0.00574458	0.0001	0.0318532	0.10417	0.0001	0.0170479	0.00575249	0.0223641	0.123466	0.0425693	0.0649101	0.00118323	0.0459958	0.00782024	0.00541113	0.0457728	0.0437541	0.0494787	0.0120969	0.0328561	0.0951229	0.173283	0.0234243	0.0153358	0.0520459	0.159482	0.0319129	0.0001	0.0001	0.0001
1	47	0.0001	0.00574566	0.00576065	0.0001	0.0171226	0.298699	0.00265865	0.0389123	0.0738385	0.0001	0.884188	0.0214868	0.00219695	0.0474173	0.0229197	0.0001	0.00881768	0.0001	0.0001	0.0001	0.0320081	0.0314738	0.0001	0.0171695	0.00607039	0.0228948	0.0364763	0.0425622	0.0658086	0.00337369	0.0462344	0.0001	0.00642734	0.0001	0.0547649	0.0545322	0.012115	0.0329166	0.0967259	0.178985	0.0293548	0.0337369	0.0878955	0.836882	0.140073	0.0001	0.0001	0.0001
1	50	0.0001	0.0034374	0.0035828	0.0147101	0.0001	2.06486	0.00189518	0.0427785	0.0217922	0.0001	2.4251	0.0383903	0.00165573	0.0422655	0.0736547	0.00263146	0.00332692	0.0387168	0.0001	0.0276354	0.0674641	0.0389442	0.00271424	0.0054173	0.00366213	0.0001	0.0445459	0.0352844	0.0500362	0.00553598	0.0422055	0.0001	0.00863892	0.0420071	0.0270461	0.050215	0.00961246	0.0248325	0.0001	0.178044	0.0410183	0.0233245	0.0608817	0.0876633	0.134316	0.00307628	0.00298879	0.00542363
1	52	0.0001	0.00368064	0.00362226	0.039782	0.0001	1.35687	0.00274928	0.0187138	0.0824266	0.0001	1.98532	0.0388215	0.00223273	0.0453775	0.0753902	0.00274147	0.00385776	0.0408356	0.00378476	0.0194028	0.0682681	0.0771981	0.0028311	0.00593439	0.00380428	0.0001	0.0439832	0.0402858	0.0485671	0.00574532	0.0430109	0.0001	0.00890773	0.0421382	0.0401906	0.0478441	0.00960067	0.0248921	0.0001	0.18266	0.0500772	0.0443313	0.0956056	0.736708	0.412334	0.00348304	0.00384723	0.0254368
1	64	0.0001	0.00344011	0.00346033	0.0175261	0.0001	1.28626	0.0273248	0.0221531	0.032946	0.0001	1.21309	0.0381754	0.0001	0.042318	0.0724306	0.00268168	0.00271797	0.0001	0.0001	0.0259801	0.0794173	0.0356797	0.0026538	0.00523696	0.0001	0.0001	0.0588411	0.0357345	0.0606933	0.00465438	0.0420682	0.0652186	0.00855539	0.0420218	0.0302892	0.0443855	0.00957916	0.0247461	0.0001	0.172618	0.0433964	0.017271	0.0572117	0.221554	0.154217	0.00311064	0.00356797	0.00991724
1	67	0.0001	0.00346187	0.00352197	0.00692814	0.0001	1.3	0.00284451	0.0146304	0.0153608	0.0001	0.965025	0.0380646	0.0016445	0.0421315	0.0728684	0.00258944	0.00392027	0.0388227	0.00348756	0.0236497	0.0664311	0.049399	0.00259105	0.00523763	0.00356128	0.0001	0.0447519	0.0353165	0.0478327	0.00433702	0.042057	0.0001	0.00851998	0.0420862	0.0277044	0.0428271	0.00957886	0.0247513	0.0001	0.172517	0.0397579	0.0166008	0.0500016	0.144119	0.102864	0.00284858	0.00293238	0.00845003
1	72	0.0001	0.00340864	0.00379953	0.115953	0.00329188	0.399966	0.00275093	0.0242048	0.0523467	0.0171297	1.06071	0.052217	0.00198003	0.0395666	0.0407246	0.00371939	0.010318	0.0510095	0.00366403	0.0001	0.0751145	0.25045	0.00378141	0.006862	0.00415302	0.00831789	0.231415	0.0424248	0.0785656	0.0892601	0.0386707	0.0001	0.017186	0.0384227	0.0556664	0.011254	0.0152213	0.0348776	0.0001	0.376021	0.0703631	0.0815119	0.101528	1.38593	0.20714	0.0001	0.0001	0.0169113
1	79	0.0001	0.00341319	0.00344807	0.0103981	0.00200496	1.4826	0.00115999	0.0366312	0.0110501	0.00158137	1.4916	0.048466	0.000793513	0.0383048	0.0410405	0.00360578	0.00720628	0.0001	0.00343952	0.0001	0.0392402	0.0396131	0.00360922	0.0060328	0.0001	0.00720455	0.0197127	0.0414832	0.0780688	0.0077199	0.0383269	0.0001	0.0111182	0.0001	0.0435407	0.00986984	0.0147787	0.00989821	0.0001	0.140701	0.0534615	0.0205381	0.0479959	0.480654	0.0279488	0.00420868	0.00446698	0.00550569
1	82	0.0001	0.00348138	0.00365546	0.0159128	0.0225229	1.98713	0.00143106	0.0322294	0.0557726	0.00918604	1.19475	0.0488841	0.0001	0.0402656	0.0409897	0.00376485	0.00741589	0.0512132	0.00434024	0.0001	0.0412032	0.024379	0.00378435	0.00637652	0.00384984	0.00797808	0.0125777	0.0434988	0.08142	0.0822416	0.038829	0.0001	0.0148783	0.0383617	0.0563597	0.0227811	0.0148163	0.00994725	0.0001	0.139657	0.0683529	0.031838	0.104153	2.08842	0.10535	0.0001	0.00497745	0.0116773
2	6	0.0001	0.00457413	0.00482709	0.0122789	0.058962	0.384468	0.00322073	0.0353736	0.0720987	0.0241061	0.813465	0.0531842	0.0017914	0.0715042	0.0220641	0.0111478	0.0001	0.0001	0.00476368	0.0235553	0.0529862	0.079756	0.0111915	0.039555	0.00474223	0.0249264	0.0884841	0.0511339	0.0744221	0.00711965	0.071206	0.288874	0.00891485	0.0001	0.0866152	0.0614903	0.0146553	0.0488325	0.0001	0.173098	0.0696886	0.018662	0.0789949	2.47313	0.181383	0.0116396	0.0116389	0.019411
2	12	0.0001	0.00457695	0.00482181	0.073551	0.026458	1.58984	0.00358925	0.0635917	0.109328	0.0389599	1.11046	0.0537254	0.00241479	0.0721848	0.0227047	0.0112002	0.0102863	0.0001	0.00508493	0.0978714	0.0574719	0.109801	0.0112108	0.0393258	0.00501459	0.0245312	0.0865267	0.049077	0.0800317	0.00859045	0.0726971	0.315916	0.00848191	0.0001	0.0618724	0.0569098	0.0146654	0.0488065	0.0001	0.166223	0.0724947	0.0397668	0.108222	1.36665	0.217502	0.0117892	0.0144708	0.0151485
2	20	0.0001	0.00470425	0.00467055	0.0603156	0.169658	2.62824	0.00546572	0.069111	0.12577	0.0523793	1.8121	0.0533398	0.00473664	0.0725786	0.0225	0.011468	0.00661644	0.0546169	0.00477485	0.566962	0.0736832	0.262955	0.0112926	0.0393104	0.00494394	0.0254398	0.263791	0.0488895	0.0778569	0.00958673	0.0722553	2.06931	0.0114553	0.0711044	0.0645412	0.0654808	0.0147056	0.0487719	0.0001	0.166445	0.0715026	0.023866	0.0987125	1.21888	0.13934	0.0114315	0.0147028	0.020209
2	30	0.0001	0.00574531	0.00578714	0.00709867	0.0783332	0.65133	0.00542699	0.0464319	0.23335	0.00303867	2.07414	0.0216031	0.00345175	0.0472879	0.0242952	0.0001	0.00983886	0.0226632	0.00601033	0.143369	0.0355596	0.895427	0.0001	0.0172315	0.00624792	0.0236879	0.867978	0.0425757	0.0703507	0.00488367	0.0471397	0.169639	0.00585234	0.0459121	0.0522863	0.051208	0.0122404	0.0399143	0.108963	0.217355	0.0332827	0.0589914	0.104345	1.56775	0.136263	0.0001	0.0001	0.0001
2	31	0.0001	0.00577138	0.0057323	0.0001	0.00168052	0.409523	0.00290049	0.0612764	0.0697288	0.00190192	2.17464	0.0210602	0.00225855	0.0469414	0.0224752	0.0001	0.00865373	0.0215973	0.0058147	0.0001	0.0307796	0.0001	0.0001	0.0170714	0.00578443	0.0224584	0.0118048	0.0446144	0.0643577	0.00266974	0.0460814	0.067023	0.0059895	0.045941	0.0438115	0.0526038	0.0121102	0.0329291	0.0991752	0.177328	0.0282395	0.0240566	0.0701684	0.59077	0.0276768	0.0001	0.0001	0.0001
2	37	0.0001	0.00577453	0.00574506	0.0313888	0.0671959	0.725941	0.00538041	0.0476466	0.0705266	0.00778354	1.30019	0.021064	0.00236527	0.0469477	0.0245817	0.0001	0.00888992	0.0001	0.0058264	0.0001	0.0362367	0.547516	0.0001	0.0170304	0.00580698	0.0224389	0.554193	0.0424577	0.0693289	0.00236371	0.0467549	0.0365716	0.00556713	0.0458941	0.0466227	0.0515699	0.0121125	0.0328822	0.104917	0.174774	0.0306307	0.0301072	0.0727875	0.870055	0.100248	0.0001	0.0001	0.0001
2	38	0.0001	0.00574046	0.00582604	0.000207957	0.0052658	0.547212	0.00250832	0.0385249	0.0268904	0.00115391	1.01798	0.0209392	0.00201755	0.0459599	0.0220314	0.0001	0.00885397	0.0001	0.0057398	0.0001	0.0304822	0.00450886	0.0001	0.0170104	0.0001	0.0224436	0.0188024	0.0424411	0.0651418	0.00140709	0.0458776	0.0224468	0.00561669	0.0457995	0.0423693	0.0494097	0.0120988	0.0328882	0.0968792	0.174086	0.0228154	0.0149506	0.0538168	0.235631	0.0320039	0.0001	0.0001	0.0001
2	39	0.0001	0.00571956	0.00580089	0.0001	0.0344074	0.515889	0.00607982	0.0345262	0.0470926	0.00639388	0.688471	0.0211384	0.0001	0.0472809	0.0223567	0.0001	0.00937921	0.0216044	0.00582397	0.0001	0.0370942	0.0617003	0.0001	0.0171236	0.00584487	0.0224774	0.0789574	0.0427372	0.0646777	0.00390141	0.0463107	0.0867158	0.00633538	0.045886	0.0428357	0.0505531	0.0121133	0.0328587	0.0957382	0.174456	0.0282463	0.0252595	0.0734043	0.744252	0.0555847	0.0001	0.0001	0.0001
2	43	0.0001	0.00577836	0.00579432	0.0001	0.00157489	0.903801	0.00990389	0.0376503	0.050186	0.0059563	0.984806	0.0213359	0.00232875	0.0466652	0.0219582	0.0001	0.0137821	0.0213263	0.0001	0.0131265	0.0439005	0.231484	0.0001	0.01708	0.00580077	0.0224106	0.243889	0.0428979	0.0660691	0.00236142	0.0459405	0.0366943	0.0054821	0.0001	0.0557596	0.0515264	0.0121174	0.0328658	0.0988669	0.175672	0.0266719	0.0268596	0.0631502	0.53675	0.0474481	0.0001	0.0001	0.0001
2	44	0.0001	0.0057671	0.00582298	0.0001	0.00644831	0.489844	0.0041076	0.0286325	0.0226833	0.0001	0.425654	0.0209276	0.00201032	0.0461283	0.0219999	0.0001	0.00855997	0.021259	0.00574998	0.0001	0.0346816	0.0243061	0.0001	0.0170377	0.00587792	0.0224886	0.0302562	0.04313	0.0643609	0.00172228	0.0459206	0.0388014	0.00555584	0.0457751	0.0441056	0.0489996	0.0121044	0.0328372	0.0970982	0.173778	0.022548	0.0189197	0.05881	0.24952	0.055327	0.0001	0.0001	0.0001
2	56	0.0001	0.00347464	0.00348377	0.0121234	0.0001	1.58224	0.00254853	0.0134296	0.0210708	0.0001	1.10151	0.0380327	0.00145796	0.0422387	0.0723789	0.00262061	0.00282703	0.0001	0.00347566	0.0649438	0.0653164	0.224264	0.00263036	0.00521301	0.00353245	0.0001	0.212605	0.0354588	0.047844	0.00495124	0.0423066	0.0001	0.00837794	0.0419791	0.0328289	0.0456324	0.00957799	0.0247704	0.0001	0.173263	0.0422356	0.0129826	0.0542975	0.316779	0.120719	0.00279675	0.0001	0.0043866
2	58	0.0001	0.0034401	0.00346293	0.0165552	0.0001	0.375103	0.00177435	0.014357	0.0256316	0.0001	0.911881	0.0381254	0.00152122	0.0423296	0.0723487	0.00260153	0.00270776	0.0387543	0.00355013	0.054558	0.0642156	0.0001	0.00265525	0.00521727	0.0035109	0.0001	0.0001	0.0360249	0.0476825	0.00463264	0.04221	0.0001	0.00838431	0.0420382	0.0281591	0.0459901	0.00958358	0.0247465	0.0001	0.17382	0.0407142	0.0228805	0.0592659	0.226673	0.196508	0.00285228	0.00315554	0.00773809
2	60	0.0001	0.00352388	0.00355162	0.00929388	0.0001	0.82317	0.00242688	0.013703	0.0200023	0.0001	0.85358	0.0380266	0.00144849	0.0422496	0.0734673	0.00262181	0.00267575	0.0384128	0.00348055	0.0458626	0.0645499	0.00953084	0.0026211	0.00533447	0.00364113	0.0001	0.0227615	0.0361978	0.0468363	0.00518577	0.0421661	0.0001	0.0084801	0.0419794	0.0282874	0.0451911	0.00957923	0.0247467	0.0001	0.172661	0.0403628	0.0179954	0.0554761	0.179632	0.15967	0.0028974	0.0001	0.00378738
2	61	0.0001	0.00350586	0.00349805	0.00685913	0.0001	2.33945	0.00314692	0.0198307	0.0148809	0.0001	1.13648	0.0381162	0.0016796	0.0422438	0.0728554	0.00259609	0.00297916	0.0382026	0.0001	0.0368868	0.0654048	0.14223	0.00263255	0.00516738	0.00352629	0.0001	0.125944	0.0351963	0.0471818	0.00426705	0.0421196	0.0001	0.0083968	0.0420171	0.0287121	0.0427503	0.00958113	0.0247425	0.0001	0.17258	0.0395136	0.0136868	0.0473978	0.103322	0.10364	0.00263897	0.00285744	0.00431819
2	62	0.0001	0.00354201	0.00353198	0.0118064	0.0001	1.26288	0.00450903	0.0109038	0.0298967	0.0001	0.686694	0.0381188	0.00168305	0.0424276	0.0755404	0.00269164	0.00316708	0.0001	0.0001	0.0581174	0.0646741	0.0484384	0.00262874	0.00521847	0.00367501	0.0001	0.0464596	0.0359863	0.0484982	0.00485171	0.0421864	0.0001	0.0085383	0.0001	0.0315478	0.0434717	0.00957865	0.0247613	0.0001	0.172404	0.0380747	0.026056	0.0556925	0.25579	0.168931	0.00291102	0.00325226	0.00383921
2	65	0.0001	0.00355619	0.00349563	0.00900936	0.0234732	1.29625	0.00381082	0.00908161	0.0351702	0.0001	0.552554	0.0382355	0.00189068	0.0425405	0.0752646	0.00268965	0.00377073	0.039287	0.00369122	0.226912	0.067732	0.0211279	0.00264208	0.00521487	0.0001	0.0001	0.0001	0.0371742	0.047658	0.00551374	0.0426897	0.198256	0.00866713	0.0420672	0.051878	0.0530308	0.00957576	0.0247532	0.0001	0.173073	0.0448194	0.0261521	0.0636198	0.840087	0.167539	0.00336364	0.00308975	0.00895851
2	69	0.0001	0.00346604	0.00353136	0.0145243	0.0001	0.45455	0.00403512	0.0153919	0.0331281	0.0001	1.45665	0.038255	0.0001	0.0426875	0.0732215	0.00273702	0.0030529	0.0001	0.00385621	0.0722633	0.070318	0.0001	0.00264666	0.00522599	0.00366402	0.0001	0.0167843	0.0360246	0.0474453	0.00557704	0.0423296	0.0001	0.0086051	0.0420755	0.0298505	0.0473792	0.00958254	0.0247547	0.0001	0.173048	0.0403152	0.0209961	0.0619213	0.327556	0.153886	0.0030263	0.00275585	0.00650514
2	70	0.0001	0.00349998	0.00350012	0.0105219	0.0001	0.0001	0.00214504	0.00806	0.0610697	0.0001	0.505045	0.0382661	0.0001	0.0439453	0.0736774	0.0028174	0.00452047	0.0400542	0.0001	0.0309832	0.0639076	0.0285389	0.00269433	0.00520581	0.00362376	0.0001	0.000771096	0.0424544	0.0471753	0.00623729	0.0425137	0.0001	0.00870324	0.0421332	0.0327816	0.0481966	0.00959189	0.0247444	0.0001	0.173985	0.0453844	0.020178	0.0815797	0.660153	0.15416	0.003925	0.00391517	0.0254683
2	84	0.0001	0.00338778	0.00345348	0.0112596	0.00227185	0.341987	0.001073	0.0208532	0.00576785	0.00415356	0.613031	0.0483913	0.000699815	0.0383558	0.0409292	0.00360094	0.00675529	0.0001	0.00351364	0.0001	0.0377929	0.0423569	0.0035945	0.00600957	0.00341318	0.00710492	0.0216492	0.0407428	0.0775827	0.00843347	0.0382534	0.0001	0.0104928	0.0001	0.0434587	0.00854153	0.0147746	0.00989205	0.0001	0.139157	0.0537765	0.0215736	0.05238	1.22143	0.0219191	0.0001	0.0001	0.00505199
2	85	0.0001	0.0033943	0.00348982	0.0321297	0.00346105	0.1384	0.00297918	0.0212082	0.0110465	0.0144461	0.78952	0.048392	0.0001	0.0389004	0.0404866	0.00365413	0.00795624	0.0504314	0.00345005	0.0001	0.0428651	0.20389	0.00365811	0.00600775	0.00344863	0.00716145	0.214213	0.0411362	0.0777903	0.0119952	0.0383078	0.0001	0.0107969	0.0381706	0.0485739	0.0084161	0.0147782	0.00988543	0.0001	0.139556	0.0602389	0.0251344	0.0628072	2.32982	0.0366902	0.0001	0.00388415	0.00474937
3	2	0.0001	0.00464224	0.00458261	0.0192052	0.0539997	0.681891	0.00365726	0.0400867	0.025781	0.0226393	0.995639	0.0533159	0.00138567	0.0714261	0.0195497	0.0111217	0.00851976	0.054553	0.00467873	0.372319	0.0568883	0.161722	0.0111249	0.0393069	0.00465476	0.0246127	0.156236	0.0476174	0.0715653	0.00525381	0.071071	0.691402	0.00862826	0.070914	0.0672813	0.0567489	0.0146718	0.0495987	0.0131542	0.206213	0.0652751	0.0254661	0.075635	1.24814	0.0641377	0.0113352	0.0113355	0.0367326
3	8	0.0001	0.00467978	0.00463338	0.0389798	0.0464883	0.149672	0.00291125	0.0637293	0.100965	0.0160167	1.90549	0.0534321	0.00174939	0.0722992	0.0221601	0.0112008	0.00718272	0.0547188	0.00469182	0.178251	0.0546074	0.0576951	0.0113242	0.0396	0.00507569	0.0248756	0.0235292	0.0520346	0.075844	0.00795203	0.0713322	0.119156	0.00879006	0.0709643	0.0650562	0.0605798	0.014702	0.0488028	0.0001	0.16661	0.0532923	0.0203602	0.0823338	2.67035	0.0620253	0.0121565	0.0123346	0.0162284
3	9	0.0001	0.00461376	0.00459276	0.0257753	0.0735766	1.23106	0.00553526	0.0501971	0.0259045	0.0422954	1.74728	0.0532098	0.0001	0.0712876	0.019475	0.0111424	0.00923654	0.0536812	0.0046399	0.287337	0.0609034	0.160435	0.0111451	0.039362	0.00467817	0.0243229	0.14749	0.0480598	0.0731685	0.00495396	0.0711863	1.26585	0.0103581	0.070913	0.0686636	0.0579351	0.014657	0.0488073	0.00132783	0.166955	0.0531688	0.0213735	0.0740796	0.675437	0.0540652	0.0114508	0.0114116	0.0112046
3	13	0.0001	0.00465216	0.00499184	0.0154582	0.124929	2.00937	0.00623292	0.0608135	0.0498794	0.0450853	1.85447	0.0531945	0.00170407	0.0714786	0.0205612	0.0113887	0.00644621	0.0536299	0.0047424	0.64774	0.0713615	0.226003	0.0111679	0.0394031	0.00473193	0.0245718	0.240344	0.048122	0.074981	0.00559335	0.0715038	2.16699	0.00942327	0.0709524	0.0634756	0.0575155	0.014665	0.048806	0.0001	0.167486	0.0651137	0.0285003	0.0872253	0.451253	0.0889305	0.0115901	0.0114384	0.0130314
3	14	0.0001	0.004659	0.00474126	0.0127719	0.0577126	5.06707	0.00745231	0.0649106	0.108839	0.0196539	0.69646	0.0534117	0.0001	0.0719463	0.022401	0.0114693	0.00669316	0.0001	0.00501221	0.0191816	0.067925	0.154634	0.0114358	0.0395287	0.00486972	0.0243571	0.20099	0.0500687	0.0780625	0.00657791	0.0720441	0.218044	0.00867516	0.071151	0.0747072	0.060916	0.0146681	0.0488151	0.0001	0.166708	0.0707414	0.0379242	0.106988	1.59437	0.152613	0.0118337	0.0134593	0.0207584
3	22	0.0001	0.00456954	0.00464803	0.0465443	0.0693481	2.56767	0.00644863	0.0420995	0.0482447	0.0285421	0.761542	0.0533141	0.00263415	0.0754774	0.0244836	0.0112232	0.0128303	0.0573307	0.00510742	0.258925	0.0739526	0.728933	0.011681	0.0395094	0.00483434	0.0244079	0.799346	0.0483375	0.0753805	0.00785671	0.0713175	1.63066	0.00920836	0.0712336	0.103373	0.0657095	0.0146768	0.0487859	0.0001	0.167318	0.0755172	0.0247009	0.0928304	1.4024	0.0731015	0.0115575	0.0127057	0.0160618
3	25	0.0001	0.00464074	0.00461046	0.029594	0.089567	1.73165	0.00659548	0.0455232	0.0731362	0.0541224	1.4349	0.0532971	0.0001	0.0720232	0.0215416	0.0113573	0.00661249	0.0539608	0.00470687	0.56079	0.0856834	0.297556	0.0112377	0.0392413	0.00467522	0.024644	0.318633	0.0478068	0.0739065	0.00544073	0.0717872	3.69625	0.00858714	0.0709449	0.0619817	0.0637792	0.0146683	0.048771	0.0001	0.166172	0.0685593	0.0233797	0.0898142	0.887922	0.0431302	0.0115347	0.012056	0.014261
3	26	0.0001	0.00573599	0.00581366	0.0001	0.0383265	0.478826	0.00533889	0.0502557	0.0456305	0.00139296	1.55794	0.0211967	0.00247182	0.0460693	0.0222933	0.0001	0.008592	0.0219282	0.00588194	0.0001	0.033097	0.271658	0.0001	0.0170509	0.00582544	0.0225859	0.304401	0.0426741	0.0687927	0.00182311	0.0460441	0.0376312	0.00550389	0.0457912	0.0433573	0.0489182	0.01212	0.0331011	0.096928	0.188552	0.0259409	0.0390491	0.0607365	0.365859	0.0586915	0.0001	0.0001	0.0001
3	28	0.0001	0.00601031	0.00575506	0.0374867	0.12898	2.04248	0.00474262	0.0597161	0.186695	0.00895561	2.39733	0.0216373	0.0028943	0.0498109	0.0228028	0.0001	0.010853	0.0001	0.00602605	0.0806228	0.0418508	0.475078	0.0001	0.0174448	0.0001	0.0224541	0.440512	0.0429825	0.0729107	0.00454209	0.0464657	0.22239	0.00571	0.0459805	0.0682164	0.0550316	0.0121774	0.0331104	0.100694	0.178139	0.0380588	0.0614447	0.111156	1.90671	0.230622	0.0001	0.0001	0.0119193
3	32	0.0001	0.00584412	0.0058091	0.0001	0.00978185	0.98267	0.00826537	0.0336557	0.0209353	0.0112305	0.720156	0.0209494	0.0001	0.0459642	0.0221825	0.0001	0.00908361	0.021112	0.00578314	0.0001	0.0338225	0.0257889	0.0001	0.0170582	0.00574409	0.0224484	0.0278406	0.0423978	0.0647094	0.00136718	0.045921	0.0385563	0.00537052	0.0001	0.0466601	0.0493785	0.0120995	0.0328451	0.0956828	0.173268	0.0235393	0.0161678	0.0578579	0.243614	0.0384938	0.0001	0.0001	0.0001
3	45	0.0001	0.00575611	0.00582605	0.0001	0.0223407	0.571256	0.00314121	0.0330163	0.0574664	0.0001	0.73775	0.0211156	0.0001	0.0462186	0.0226334	0.0001	0.00934099	0.0213722	0.00585029	0.0001	0.0322352	0.00919352	0.0001	0.0171526	0.00605161	0.0223649	0.0152683	0.0426429	0.0646225	0.00177688	0.0465339	0.179201	0.00537558	0.0458109	0.0506849	0.0494355	0.0120973	0.0328572	0.0959255	0.173806	0.0275117	0.0209562	0.0651195	0.588793	0.0541884	0.0001	0.0001	0.0001
3	49	0.0001	0.00358383	0.00345842	0.0199122	0.0001	1.15014	0.00222849	0.0239236	0.0168687	0.0001	0.881753	0.0383471	0.0001	0.0422841	0.0725568	0.0026231	0.00289958	0.0387264	0.0001	0.02643	0.0677105	0.0434167	0.0026531	0.00527831	0.0001	0.0001	0.0541967	0.0356849	0.0470391	0.00494126	0.0422165	0.0103099	0.00851306	0.0420035	0.0324485	0.042791	0.00963146	0.0255402	0.0001	0.204137	0.040437	0.0440289	0.0574616	0.154545	0.14883	0.00295566	0.0001	0.004948
3	51	0.0001	0.00356994	0.00356768	0.0385274	0.0001	2.11834	0.00253371	0.0127937	0.02075	0.0001	0.752982	0.038299	0.0001	0.0424403	0.072932	0.00263052	0.00404293	0.0385934	0.00351126	0.0161791	0.0676768	0.0960312	0.00262759	0.00522249	0.00371247	0.0001	0.0980851	0.0350791	0.0468511	0.00529338	0.0423052	0.0001	0.00846919	0.0420307	0.0318299	0.0428141	0.00958334	0.0247565	0.0001	0.17406	0.0408521	0.0227525	0.0564499	0.124877	0.14441	0.00298029	0.00336124	0.0044503
3	53	0.0001	0.00346939	0.00346101	0.0171486	0.0001	0.38707	0.0028457	0.00936184	0.0347124	0.0001	0.941279	0.0380906	0.00163401	0.042267	0.0729565	0.00263244	0.00403577	0.0386302	0.00349033	0.0576964	0.0765509	0.261197	0.00272139	0.00529062	0.0035445	0.0001	0.249403	0.0359248	0.0475836	0.00516937	0.0422057	0.0001	0.00844522	0.0419991	0.0310092	0.0453867	0.00957795	0.0247525	0.0001	0.173809	0.0427029	0.0145449	0.0526976	0.301765	0.120608	0.00302075	0.00276884	0.00652419
3	57	0.0001	0.00346917	0.00366564	0.0335903	0.00229915	1.4512	0.00389819	0.0256799	0.0546734	0.0001	1.3031	0.0388126	0.0001	0.0430353	0.0769359	0.00294021	0.00643587	0.0405798	0.0001	0.438847	0.0668404	0.0001	0.0027256	0.00559412	0.00417241	0.0001	0.0506908	0.0396853	0.0480455	0.00630019	0.0424237	0.00011014	0.00844868	0.0421605	0.0353018	0.0511889	0.00959036	0.024773	0.0001	0.174905	0.0456274	0.0256998	0.0880521	0.875766	0.160254	0.00396701	0.003664	0.0120857
3	63	0.0001	0.00345152	0.00349681	0.00718091	0.0001	0.00839614	0.00152415	0.0359172	0.0149113	0.0001	1.87161	0.0380639	0.00136457	0.0422628	0.0728537	0.00260266	0.00273681	0.0395192	0.00347463	0.0104225	0.0651743	0.0280992	0.00260702	0.00519496	0.00350828	0.0001	0.0243798	0.0353082	0.0475462	0.00449325	0.0420736	0.0001	0.00840452	0.0001	0.0270971	0.0438068	0.00958032	0.0247442	0.0001	0.172469	0.040586	0.0144233	0.048768	0.082306	0.101787	0.0027587	0.00288273	0.00700983
3	68	0.0001	0.00348086	0.0034643	0.00847443	0.0001	0.0551518	0.00380943	0.0401412	0.0218947	0.0001	1.98001	0.03809	0.0001	0.0425223	0.072858	0.00263898	0.00366839	0.0388126	0.00360478	0.0168155	0.0696072	0.0770287	0.00263833	0.00516717	0.00369089	0.0001	0.0697093	0.0359364	0.0485348	0.00491119	0.042098	0.0550819	0.00843384	0.0001	0.0385812	0.0500214	0.00957522	0.0247469	0.0001	0.172374	0.0438161	0.0182148	0.0572863	0.330294	0.116448	0.00302	0.00277836	0.00523703
3	73	0.0001	0.00339395	0.00342809	0.0223702	0.0144436	0.649131	0.00119811	0.0268793	0.0379855	0.0151167	1.4877	0.0490011	0.00163499	0.0385027	0.0419748	0.00373442	0.00707066	0.0494848	0.0001	0.0001	0.0398132	0.0299351	0.00380143	0.00718481	0.0001	0.0073157	0.0128114	0.0422461	0.0783229	0.0140413	0.0387217	0.0001	0.011673	0.0001	0.0486246	0.0150283	0.0148046	0.0114283	0.0001	0.183568	0.0547558	0.0281972	0.0750932	0.701202	0.069173	0.0001	0.00406794	0.00746609
3	75	0.0001	0.00353531	0.0037615	0.0222855	0.0310337	2.03499	0.00335913	0.0454043	0.0520159	0.00975069	3.12672	0.0491854	0.00245465	0.0399341	0.0412393	0.0039188	0.00737617	0.0542237	0.00369518	0.164817	0.0397983	0.032082	0.00375699	0.00720844	0.00437996	0.00844329	0.00433419	0.0413768	0.0801053	0.0374453	0.0393329	0.0001	0.0140179	0.0384368	0.0532535	0.0134943	0.0148533	0.00999012	0.0001	0.142964	0.066929	0.0292426	0.10925	2.94816	0.0828717	0.0001	0.0001	0.0150989
3	83	0.0001	0.00338957	0.00339437	0.012004	2.00296e-05	0.601056	0.00207105	0.0302946	0.0126683	0.000409446	1.2889	0.0484466	0.0001	0.0382897	0.0409458	0.00362829	0.00713018	0.0487933	0.00341535	0.0001	0.0419615	0.179421	0.00359865	0.00600956	0.00348352	0.00720631	0.149899	0.042109	0.0777078	0.0148072	0.0382949	0.0001	0.0106704	0.0001	0.0488216	0.0106801	0.014776	0.0098924	0.0001	0.138975	0.0520354	0.0186236	0.0500599	0.389236	0.0131172	0.0001	0.00404344	0.00435342
4	1	0.0001	0.00477947	0.0047884	0.0242125	0.0579026	1.22345	0.00544925	0.0446063	0.0298153	0.0466165	1.50926	0.0546221	0.0001	0.0712492	0.0224115	0.0111389	0.00898762	0.0584956	0.0046284	0.538687	0.0704656	0.137659	0.0110987	0.0394665	0.00558209	0.0244366	0.140458	0.0471348	0.071895	0.00422096	0.071116	2.21296	0.00857505	0.0709108	0.068067	0.0598916	0.0146636	0.0490375	0.0001	0.520103	0.0683411	0.0717043	0.075681	0.475197	0.0404601	0.0113883	0.0116155	0.0131682
4	10	0.0140065	0.00458358	0.00475171	0.0342384	0.0778389	1.375	0.00203395	0.0607359	0.0910429	0.0345431	1.53334	0.0537739	0.0023961	0.0718339	0.0230431	0.0112914	0.00696582	0.0556186	0.00508601	0.156656	0.0522939	0.276011	0.0113133	0.0394552	0.00519415	0.0249117	0.312465	0.0541347	0.0804459	0.00876269	0.0718321	0.304052	0.0130396	0.0710172	0.0805895	0.0710353	0.0147355	0.0488733	0.0001	0.165468	0.0713413	0.0368462	0.0866437	2.77904	0.0846763	0.0120684	0.0125705	0.0181754
4	11	0.0001	0.00474854	0.00465886	0.0285907	0.0872	1.11146	0.00878199	0.0533104	0.0506895	0.0334997	1.58781	0.053305	0.00161373	0.0719923	0.019662	0.0111654	0.00910256	0.0540526	0.00463634	0.170575	0.0645196	0.144328	0.0111395	0.0392756	0.00481448	0.0245113	0.116587	0.0488974	0.0726266	0.00716881	0.0712332	2.98067	0.00940637	0.0709597	0.0694842	0.0560433	0.014659	0.0488085	0.0001	0.166168	0.0532523	0.022711	0.0780429	2.02898	0.0528124	0.0113087	0.012017	0.0358614
4	15	0.0001	0.00465478	0.00491252	0.022666	0.112708	1.98853	0.00466913	0.052609	0.0520109	0.0351071	1.21315	0.0534545	0.0001	0.0717138	0.022251	0.0114745	0.00650135	0.0564	0.00485803	0.106412	0.0657779	0.150402	0.0111507	0.0392538	0.00467549	0.0243596	0.128779	0.0473356	0.0730272	0.00600213	0.0713391	1.21725	0.00872684	0.0710618	0.0640248	0.0641787	0.0146758	0.0488089	0.0001	0.166003	0.0533618	0.0316536	0.0915938	0.499817	0.087544	0.0118715	0.011639	0.0177472
4	17	0.0001	0.00482615	0.00460126	0.0477104	0.119892	4.2101	0.0113415	0.0674414	0.107663	0.0816923	2.18405	0.0533229	0.00219124	0.0717958	0.0201793	0.0112341	0.00627848	0.0558486	0.0001	0.677845	0.104336	0.39726	0.01133	0.0394391	0.00479624	0.0242706	0.441346	0.0493529	0.0765301	0.00615627	0.0726797	4.86457	0.00875171	0.0709748	0.0710688	0.069082	0.0146495	0.0487867	0.0001	0.167897	0.0533871	0.0255108	0.0903257	0.409593	0.148306	0.0116915	0.0116707	0.0247093
4	19	0.0001	0.00477783	0.00462105	0.0221332	0.0260537	0.788577	0.00453125	0.0507929	0.0858801	0.020014	2.44848	0.0534528	0.00214424	0.0723315	0.0216991	0.0112722	0.00674642	0.0597029	0.00477747	0.231583	0.0528683	0.385103	0.0113671	0.0393288	0.00499222	0.0242371	0.371496	0.0502986	0.0787455	0.00720832	0.0718236	0.198212	0.00889685	0.0001	0.0707353	0.0576367	0.0147287	0.0488031	0.0001	0.16615	0.0658609	0.0534414	0.125272	1.69559	0.179056	0.0114761	0.0121581	0.0173772
4	21	0.0001	0.00474945	0.00466778	0.0425426	0.0921261	1.87026	0.00509684	0.0614764	0.0402738	0.0572125	2.53809	0.0531487	0.00165009	0.0714743	0.0203088	0.0112247	0.00865845	0.0539048	0.0001	0.351522	0.0725286	0.281095	0.0112287	0.0392969	0.0001	0.0243281	0.280321	0.0480704	0.0737267	0.0056116	0.0712559	4.09327	0.00844123	0.0710125	0.0629942	0.057578	0.0146563	0.0487825	0.0001	0.166339	0.0533535	0.0187824	0.0834799	0.571256	0.0545396	0.0114881	0.0122129	0.0210567
4	27	0.0001	0.00575471	0.00583778	0.0001	0.03172	1.39477	0.00465272	0.0445332	0.0545809	0.000184293	1.41864	0.0211171	0.00237868	0.0461054	0.0225674	0.0001	0.0115004	0.021544	0.0058121	0.0001	0.0328773	0.290083	0.0001	0.0170104	0.00577838	0.0229372	0.315567	0.0431879	0.0650735	0.0019486	0.0462093	0.0149027	0.00570879	0.0001	0.119658	0.0490769	0.0121087	0.0330025	0.102117	0.17927	0.0210029	0.0233115	0.0658479	0.322601	0.0287911	0.0001	0.0001	0.0001
4	29	0.0001	0.00599673	0.00617626	0.0001	0.194923	2.64334	0.00527502	0.0492366	0.25489	0.00566697	1.42699	0.0226476	0.0001	0.047584	0.0354508	0.0001	0.00910773	0.0271043	0.00676243	0.0829257	0.0393983	0.002408	0.0001	0.0184751	0.00756959	0.0284824	0.0489689	0.0430699	0.0694351	0.00887618	0.0478075	0.0001	0.00547991	0.0461074	0.0590361	0.0574638	0.0124415	0.0363786	0.118968	0.243654	0.0349752	0.0702742	0.117851	1.99919	0.110864	0.0001	0.0001	0.00635469
4	33	0.0001	0.00572783	0.00581027	0.0001	0.0506182	0.0495557	0.00496739	0.0498386	0.130281	0.0160241	2.06945	0.0211578	0.00253081	0.0466719	0.0238963	0.0001	0.00953685	0.0218621	0.00592831	0.0001	0.150833	0.315025	0.0001	0.017124	0.0058521	0.0225906	0.31092	0.0426585	0.0675446	0.00313447	0.047256	0.0014671	0.00539079	0.0458976	0.0455996	0.0495341	0.012096	0.0331081	0.0973971	0.175645	0.0296711	0.018825	0.0725156	0.954628	0.0443106	0.0001	0.0001	0.0001
4	41	0.0001	0.00572875	0.00578198	0.0001	0.00213986	0.209743	0.00234106	0.031741	0.0215882	0.0001	0.620436	0.0210577	0.00191723	0.0460335	0.0218852	0.0001	0.00856236	0.02147	0.00575287	0.0102067	0.0306635	0.00661205	0.0001	0.0170202	0.00586136	0.0223853	0.0220228	0.042401	0.0644843	0.00188002	0.0462759	0.00514605	0.00547241	0.0458285	0.0438179	0.0499689	0.0120952	0.0328456	0.0961558	0.173486	0.0246861	0.0189004	0.0611765	0.360604	0.0394467	0.0001	0.0001	0.0001
4	42	0.0001	0.00575509	0.00573386	0.0001	0.00553866	4.57099	0.00376589	0.0515354	0.034099	0.0001	1.604	0.0210317	0.00224482	0.0464162	0.0217095	0.0001	0.00887503	0.0216225	0.00576173	0.0001	0.0309041	0.0232221	0.0001	0.0170139	0.00580225	0.0224919	0.0306843	0.0425415	0.0662595	0.00182095	0.0460639	0.0580532	0.00546343	0.0458435	0.0431609	0.0501801	0.0121013	0.0328316	0.0959469	0.174233	0.0257571	0.019057	0.0623232	0.475909	0.042768	0.0001	0.0001	0.0001
4	46	0.0001	0.00574136	0.00589283	0.0001	0.0163055	1.30976	0.00374805	0.0469476	0.0844442	0.00170296	1.76135	0.0211574	0.0001	0.0466779	0.0315988	0.0001	0.0117029	0.0001	0.00594925	0.0001	0.0326441	0.673415	0.0001	0.0170649	0.00599613	0.0224804	0.619706	0.042434	0.0665492	0.00361676	0.0468894	0.0753399	0.00604292	0.0001	0.053806	0.0615766	0.01213	0.0329499	0.097055	0.173232	0.0325045	0.0310969	0.0953786	1.2178	0.0680665	0.0001	0.0001	0.0001
4	48	0.0001	0.00574879	0.00574647	0.0001	0.0001	0.622064	0.00277175	0.0305352	0.0269311	0.0001	0.533287	0.0210001	0.00209672	0.0460734	0.0230375	0.0001	0.00941665	0.0213052	0.00574734	0.0001	0.0331279	0.150938	0.0001	0.0170623	0.00582131	0.0223979	0.176352	0.0424266	0.0645126	0.0014729	0.0459986	0.0001	0.00534348	0.0458173	0.046087	0.0489545	0.0120996	0.0328451	0.0959479	0.173234	0.0232676	0.0177604	0.0590683	0.261056	0.0560926	0.0001	0.0001	0.0001
4	54	0.0001	0.00351653	0.00361904	0.0375726	0.0001	0.00979573	0.00636468	0.0149943	0.0231946	0.0001	0.964213	0.0380982	0.00156637	0.0423095	0.0736968	0.00268566	0.00393235	0.0385815	0.00370189	0.0151023	0.0708821	0.0738198	0.00266368	0.00518142	0.0001	0.0001	0.0881667	0.0351305	0.0492453	0.00586335	0.0422675	0.00656092	0.00842641	0.04201	0.0305657	0.0428109	0.00961254	0.0248144	0.0001	0.172528	0.0411845	0.0224585	0.0583606	0.278548	0.157575	0.0001	0.00297344	0.00406993
4	55	0.0001	0.00349361	0.00346102	0.00941338	0.0001	1.49305	0.00488502	0.0114762	0.0199275	0.0001	0.813153	0.0380809	0.00139343	0.0423776	0.0736792	0.00265819	0.00288919	0.0383966	0.0035095	0.0710198	0.067637	0.0706739	0.00266767	0.00527438	0.00353908	0.0001	0.0653042	0.035218	0.0488435	0.00482229	0.042262	0.0001	0.00900719	0.0420141	0.0440671	0.0430893	0.00958191	0.024751	0.0001	0.17294	0.0398386	0.0208622	0.0561146	0.29442	0.160268	0.0031197	0.00321611	0.00329848
4	59	0.0001	0.00355788	0.00344917	0.00846847	0.0001	0.232728	0.00402688	0.0132972	0.0166363	0.0104001	0.696303	0.0380032	0.00142444	0.0421553	0.0728838	0.00261069	0.00284618	0.0382859	0.00347179	0.0215611	0.06616	0.0001	0.00261538	0.00519087	0.00356556	0.0001	0.0001	0.0352802	0.0471757	0.00457315	0.0420288	0.893882	0.00837732	0.0419671	0.0314278	0.0432814	0.00957574	0.0247432	0.0001	0.172697	0.0416992	0.0142329	0.0502036	0.197727	0.117354	0.00307477	0.00300845	0.00850218
4	66	0.0001	0.00349398	0.00364163	0.00370396	0.0001	1.44958	0.0049249	0.0237152	0.0537948	0.0001	1.2635	0.0382528	0.00283898	0.0426935	0.0722269	0.00294352	0.00301056	0.0001	0.0001	0.0976097	0.0679613	0.0271317	0.00270089	0.00522393	0.0001	0.0001	0.0407722	0.038256	0.0476024	0.0058003	0.0424105	0.0001	0.00890072	0.042133	0.0461814	0.0444038	0.0095856	0.0247476	0.0001	0.172927	0.0432229	0.0254732	0.0861055	0.617868	0.226549	0.0001	0.0001	0.00711182
4	74	0.0001	0.00339112	0.00340383	0.00559109	0.0001	0.133447	0.00250374	0.0224239	0.0130484	0.00295507	1.10959	0.0485897	0.000814587	0.038508	0.0406759	0.00360645	0.00675552	0.0492847	0.0001	0.0001	0.0392966	0.393167	0.0036343	0.00605404	0.00349058	0.00735211	0.340266	0.0407958	0.0813106	0.00699645	0.0382564	0.156784	0.0112212	0.0381842	0.0458901	0.0101994	0.0147786	0.00988363	0.0001	0.145638	0.0523328	0.0190097	0.0498742	0.227884	0.0234071	0.00380236	0.0037999	0.00464883
4	76	0.0001	0.00337674	0.00340348	0.0144908	0.0001	1.43139	0.00343914	0.0234784	0.0107441	0.000950212	0.942394	0.0485433	0.0001	0.0383506	0.0416409	0.00363408	0.00673779	0.0486916	0.0034887	0.0001	0.0408584	0.0851734	0.00362001	0.00603571	0.00344026	0.00708095	0.0555297	0.0407763	0.0777162	0.00488915	0.0001	0.0001	0.0109085	0.038186	0.0435105	0.0082541	0.0147908	0.00988442	0.0001	0.139104	0.0524202	0.019804	0.0480723	0.209662	0.0212931	0.0001	0.00413852	0.00456563
4	78	0.0001	0.00342028	0.00350125	0.0131443	0.00743259	0.0493619	0.00198655	0.0391496	0.0269822	0.00695283	2.06403	0.0485935	0.00195971	0.0389148	0.0406989	0.0036476	0.00755136	0.0505188	0.00355407	0.0001	0.0381843	0.061338	0.00363056	0.0062424	0.00376086	0.00750193	0.0262991	0.0409424	0.0774468	0.0129632	0.0383558	0.0001	0.0114946	0.0001	0.0457848	0.00942718	0.0147839	0.00994979	0.0001	0.142118	0.0570134	0.0290207	0.0618123	0.740513	0.101135	0.0001	0.0001	0.00885241
5	101	0.0001	0.00338083	0.00339671	0.0101092	0.0001	0.106582	0.0109659	0.0273221	0.0138758	7.56513e-06	1.47749	0.0484966	0.00074414	0.0386572	0.0413931	0.00361103	0.00677949	0.0001	0.00342575	0.0001	0.0477883	0.200372	0.00359781	0.0060749	0.0001	0.00717097	0.17173	0.0408283	0.0781797	0.019222	0.0383017	0.0381049	0.0106342	0.0001	0.0435718	0.00792965	0.0147901	0.00989076	0.0001	0.139183	0.0484053	0.026786	0.0571441	1.25774	0.00974104	0.0001	0.00375162	0.00563422
5	102	0.0001	0.00338777	0.00340565	0.0141433	0.00817247	0.769063	0.00185883	0.0225913	0.0150812	0.00752288	0.787723	0.0485865	0.0001	0.0388192	0.0455301	0.00366112	0.0116084	0.0503077	0.00352758	0.0001	0.0395819	0.511517	0.00362485	0.0062086	0.00354428	0.00734889	0.445957	0.040996	0.077958	0.0652115	0.038463	0.0001	0.0106861	0.0381866	0.0453147	0.0117457	0.0148057	0.00988235	0.0001	0.139582	0.0598894	0.0286877	0.07455	3.11336	0.101004	0.0001	0.0001	0.00725372
5	103	0.0001	0.00339881	0.00339387	0.0239723	0.0146858	1.18178	0.00395329	0.0338853	0.00832392	0.0160014	1.61812	0.0484053	0.000874662	0.038603	0.0404266	0.00362916	0.00959999	0.0488191	0.00345662	0.0001	0.0460517	0.421667	0.0036165	0.00612424	0.00353176	0.00710417	0.38537	0.0410457	0.0778477	0.0180797	0.0382714	0.0001	0.010422	0.0381861	0.0487736	0.0111397	0.014783	0.00989075	0.0001	0.139246	0.0547772	0.0282502	0.0559555	1.68128	0.00896063	0.00370101	0.00372547	0.00566387
5	104	0.0001	0.00339388	0.00369709	0.0458876	0.00757111	0.729028	0.00226765	0.0370918	0.0166724	0.0001	0.815633	0.0486298	0.0001	0.038558	0.0442806	0.00367276	0.00705632	0.0497974	0.0001	0.0001	0.0392759	0.0281096	0.00366261	0.00602963	0.00378288	0.00719418	0.0114349	0.0412641	0.0786179	0.0286183	0.0385493	0.0001	0.0104628	0.0382288	0.0446776	0.0098517	0.0148168	0.00991144	0.0001	0.138978	0.0675032	0.0428746	0.0881461	4.67577	0.0511961	0.0001	0.00386451	0.00500921
5	105	0.0001	0.0033851	0.00350226	0.0146783	0.0142004	0.581026	0.00118663	0.0235365	0.016561	0.00231435	0.901439	0.0485064	0.0001	0.0384671	0.0422207	0.003621	0.00698992	0.0489114	0.0001	0.0001	0.038491	0.033227	0.00361083	0.00601995	0.00349158	0.0071006	0.0230247	0.0409753	0.0776598	0.0104188	0.038251	0.0001	0.0105536	0.0382118	0.0451106	0.00810202	0.0147743	0.00987789	0.0001	0.139354	0.0484593	0.0222412	0.0598117	2.08159	0.0405596	0.0001	0.00374986	0.00468348
5	106	0.0001	0.00339783	0.0034315	0.00963812	0.0001	0.633851	0.00514748	0.0439316	0.00848488	0.00823663	2.2869	0.0486443	0.000867908	0.0383326	0.040569	0.00360058	0.00697767	0.0490547	0.0001	0.0001	0.0414326	0.104463	0.00362879	0.00599709	0.00356472	0.00718867	0.0855009	0.0407907	0.0778367	0.0142057	0.038234	0.0665568	0.0106858	0.0381713	0.0541908	0.00954064	0.0147777	0.00988187	0.0001	0.139242	0.0517176	0.0199298	0.0455984	0.459676	0.0100764	0.00365276	0.0001	0.00428907
5	107	0.0001	0.00338389	0.00341634	0.0127585	0.00853717	2.4939	0.00186714	0.0281082	0.0139854	0.0001	1.30267	0.0486979	0.00104349	0.038522	0.040592	0.00363046	0.0112303	0.0492388	0.00347384	0.0001	0.0403711	0.985019	0.0036309	0.00624596	0.00346766	0.00726288	0.907098	0.0411529	0.0784856	0.0360088	0.0382254	0.0001	0.0107568	0.0382025	0.0509096	0.00791322	0.0147756	0.00989369	0.0001	0.139606	0.0592081	0.0261405	0.0680791	2.46838	0.0608175	0.0001	0.0001	0.00513235
5	190	0.0001	0.00342573	0.00384368	0.152867	0.0519399	0.142712	0.0154607	0.028372	0.0494752	0.00433128	1.82901	0.0489848	0.00435125	0.0405949	0.0419898	0.00389883	0.00787916	0.0001	0.00382592	0.0129966	0.0540337	0.2111	0.00408752	0.00629118	0.00467822	0.00778483	0.169037	0.0462691	0.080814	0.274539	0.0389075	0.0001	0.0203409	0.0385851	0.0500336	0.015872	0.0148829	0.0101425	0.0001	0.139826	0.135011	0.140219	0.243376	21.0611	0.18219	0.0001	0.00586521	0.00708876
5	112	0.0001	0.00340058	0.0035975	0.0254541	0.0205819	1.79739	0.00260981	0.0261013	0.0101902	0.0123531	0.94355	0.048414	0.0001	0.0387989	0.0422613	0.00362446	0.00732949	0.0001	0.00371276	0.0001	0.04464	0.177885	0.0037818	0.0062287	0.00362677	0.00729932	0.144449	0.0411037	0.0862144	0.106412	0.0001	0.0001	0.0109538	0.0382273	0.0520364	0.0111335	0.0147748	0.00989906	0.0001	0.139009	0.0484516	0.0278921	0.0787515	3.79556	0.114339	0.0001	0.0001	0.0127322
5	113	0.0001	0.00352718	0.00391899	0.207144	0.0497347	0.546712	0.00200368	0.0357923	0.0659262	0.024549	2.39798	0.0489436	0.00568972	0.0398054	0.0498297	0.00405385	0.0133973	0.0001	0.0001	0.177829	0.0404651	0.43705	0.00415931	0.00648885	0.0047064	0.00734266	0.506511	0.0420702	0.0796268	0.471992	0.0387519	0.0001	0.0138314	0.0001	0.094495	0.0190203	0.0148499	0.00999768	0.0001	0.1429	0.0494117	0.0452305	0.169646	13.4181	0.409434	0.00516444	0.0001	0.0213668
5	115	0.0001	0.00347242	0.00352442	0.0113799	0.0001	1.61943	0.00158308	0.0199825	0.0132942	0.0026783	0.712947	0.0483987	0.00127911	0.0384718	0.0407329	0.00360781	0.00800422	0.0489874	0.0001	0.0001	0.040914	0.0395457	0.00362895	0.00600193	0.00348422	0.00710447	0.0220291	0.041017	0.0786724	0.056087	0.0382461	0.0136634	0.0106271	0.0381879	0.0462722	0.00876047	0.014779	0.00988293	0.0001	0.138851	0.0484425	0.0229418	0.063349	2.39107	0.0403136	0.00391437	0.0001	0.00414751
5	116	0.0001	0.00430857	0.00442985	0.0510058	0.0269323	0.324737	0.00238476	0.0434852	0.0544982	0.0198824	1.0666	0.0579028	0.0001	0.0365604	0.0245235	0.0001	0.0001	0.0595019	0.00489617	0.0001	0.0425625	0.0587278	0.0001	0.0230969	0.00518818	0.0164629	0.0497979	0.0264893	0.051012	0.0001	0.0364691	0.0001	0.00529185	0.0001	0.0128434	0.0162537	0.00940027	0.0379676	0.0001	0.560234	0.0973992	0.0371503	0.0976914	4.41933	0.0213576	0.0001	0.0001	0.0001
5	117	0.0001	0.00430055	0.0044813	0.00172939	0.0308063	1.01252	0.00438619	0.046106	0.0428988	0.0212227	2.04878	0.0575552	0.00155999	0.0362418	0.0236322	0.0001	0.00359995	0.0643944	0.0001	0.0001	0.0302272	0.0506399	0.0001	0.0229317	0.00459246	0.0158552	0.0116862	0.0290683	0.0532031	0.0001	0.0359525	0.0001	0.00496932	0.0359189	0.0232134	0.0254686	0.00936177	0.00803302	0.0001	0.228735	0.0821182	0.0458979	0.0901765	3.13553	0.0735243	0.0001	0.0001	0.0001
5	118	0.0001	0.00444358	0.00433783	0.00197842	0.0194564	2.14584	0.00551163	0.0569644	0.0709901	0.019542	1.57064	0.057524	0.0017239	0.0365879	0.022911	0.0001	0.0001	0.0596893	0.00479375	0.0001	0.0306796	0.0272502	0.0001	0.0230386	0.00484576	0.0159802	0.0001	0.0278217	0.0511695	0.0001	0.036244	0.0001	0.00444139	0.0359699	0.0205468	0.0194099	0.00934941	0.00493257	0.0001	0.202204	0.10156	0.0504526	0.110721	4.8151	0.0539624	0.0001	0.0001	0.0001
5	120	0.0001	0.00432591	0.00434495	0.00933037	0.0243002	0.311851	0.00447263	0.0580245	0.0414288	0.0313466	1.91109	0.0573416	0.0001	0.0361683	0.021095	0.0001	0.0001	0.058029	0.00436622	0.0550072	0.0369268	0.0198413	0.0001	0.0226764	0.00440955	0.0155351	0.0055424	0.0267404	0.0558262	0.0001	0.035938	0.0001	0.00452966	0.0358352	0.0129203	0.024773	0.00932041	0.00289275	0.0001	0.168365	0.0785428	0.0331787	0.0731495	2.48227	0.0438318	0.0001	0.0001	0.0001
5	121	0.0001	0.00427828	0.00434703	0.0416043	0.0214815	0.890098	0.00150544	0.0427272	0.0646129	0.0318073	2.07572	0.0575047	0.0001	0.0363429	0.0212473	0.0001	0.00289179	0.0598833	0.00461901	0.162538	0.0268574	0.0371739	0.0001	0.0227907	0.0001	0.0156797	0.00656782	0.0265088	0.0597031	0.0001	0.0360388	0.0001	0.00459526	0.0360374	0.0171193	0.0348092	0.00933238	0.00504053	0.0001	0.169625	0.101367	0.0337386	0.111782	5.70061	0.0438556	0.0001	0.0001	0.0001
5	122	0.0001	0.00425144	0.00452218	0.0753879	0.0382411	0.0772829	0.00335578	0.0407862	0.103325	0.0184281	1.12652	0.0575721	0.0001	0.036128	0.0210425	0.0001	0.0001	0.0581346	0.0001	0.0730938	0.0304185	0.0214205	0.0001	0.0227396	0.00489436	0.0155761	0.034345	0.0288254	0.0509583	0.0001	0.0361423	0.0001	0.00419719	0.036188	0.021696	0.016158	0.00931882	0.00508346	0.0001	0.165779	0.0857377	0.055201	0.119091	7.06409	0.147696	0.0001	0.0001	0.0001
5	123	0.0001	0.00433922	0.00428125	0.0001	0.0001	1.70437	0.00385879	0.0454344	0.0285464	0.0311583	1.36629	0.0573099	0.00106436	0.0358495	0.0202421	0.0001	0.00224769	0.0577512	0.0001	0.0001	0.0259043	0.0001	0.0001	0.0226723	0.0001	0.0155767	0.0001	0.0264989	0.0509375	0.0001	0.0358678	0.0001	0.00425714	0.0358125	0.0105402	0.0190501	0.00932247	0.00240879	0.0001	0.162326	0.0715722	0.0187968	0.0549673	1.39092	0.00315822	0.0001	0.0001	0.0001
5	124	0.0001	0.00431414	0.00446843	0.0001	0.0168108	1.23606	0.00134726	0.0462305	0.0240156	0.0203096	1.03279	0.0574828	0.0001	0.036528	0.0209658	0.0001	0.0001	0.0001	0.00468184	0.122818	0.0261978	0.0270588	0.0001	0.0226558	0.00473022	0.015574	0.0001	0.0269662	0.0526016	0.0001	0.0359052	0.0001	0.00458408	0.0359923	0.0479302	0.0199086	0.00932046	0.00383676	0.0001	0.1623	0.0942479	0.0355526	0.0958989	5.17626	0.038222	0.0001	0.0001	0.0001
[truncated: 335 more columns]
